# Supplementary material for: Exciton–phonon coupling in alanine-based hybrid lead bromide
Source: Royal Society of Chemistry journal article supplement (doi:10.1039/d2ma00752e), 2022-01-01
Supplement: d2ma00752e1.pdf [file d2ma00752e1.pdf]

# Supporting Information

## Exciton-Phonon Coupling in Alanine Base Hybrid Lead Bromide

Francisco Nailson F. Vasconcelos,<sup>a,b</sup> Bruno S. Araújo,<sup>c,a</sup> Dieric S. Abreu,<sup>d</sup> Padron Gomez, M.A,<sup>a</sup>  
Alejandro P. Ayala,<sup>a</sup> and Carlos William A. Paschoal<sup>a\*</sup>

### Corresponding authors' e-mail:

paschoal.william@fisica.ufc.br

Table S1: Crystal data and details of the refinement AlaPbBr<sub>3</sub>.H<sub>2</sub>O.

| Crystal data                               | AlaPbBr <sub>3</sub> .H <sub>2</sub> O                                |
|--------------------------------------------|-----------------------------------------------------------------------|
| Empirical formula                          | C <sub>3</sub> H <sub>10</sub> Br <sub>3</sub> NO <sub>3</sub> Pb     |
| Formula weight                             | 555.04                                                                |
| Temperature [K]                            | 298.0                                                                 |
| Crystal system                             | monoclinic                                                            |
| Space group (number)                       | <i>C</i> 2 (5)                                                        |
| <i>a</i> [Å]                               | 21.8573(12)                                                           |
| <i>b</i> [Å]                               | 6.0851(4)                                                             |
| <i>c</i> [Å]                               | 8.7665(5)                                                             |
| $\alpha$ [°]                               | 90                                                                    |
| $\beta$ [°]                                | 93.367(2)                                                             |
| $\gamma$ [°]                               | 90                                                                    |
| Volume [Å <sup>3</sup> ]                   | 1163.97(12)                                                           |
| <i>Z</i>                                   | 4                                                                     |
| $\rho_{\text{calc}}$ [gcm <sup>-3</sup> ]  | 3.167                                                                 |
| $\mu$ [mm <sup>-1</sup> ]                  | 40.057                                                                |
| <i>F</i> (000)                             | 984                                                                   |
| Crystal size [mm <sup>3</sup> ]            | 0.124×0.097×0.057                                                     |
| Crystal colour                             | clear light yellow                                                    |
| Crystal shape                              | plate                                                                 |
| Radiation                                  | CuK $\alpha$ ( $\lambda$ =1.54178 Å)                                  |
| 2 $\Theta$ range [°]                       | 10.11 to 136.26 (0.83 Å)                                              |
| Index ranges                               | -26 ≤ <i>h</i> ≤ 26<br>-7 ≤ <i>k</i> ≤ 7<br>-10 ≤ <i>l</i> ≤ 10       |
| Reflections collected                      | 13066                                                                 |
| Independent reflections                    | 2075                                                                  |
| <i>R</i> <sub>indices</sub>                | <i>R</i> <sub>int</sub> =0.0473<br><i>R</i> <sub>sigma</sub> = 0.0342 |
| Completeness to<br>$\Theta = 67.679^\circ$ | 99.4 %                                                                |
| Data / Restraints / Parameters             | 2075/1/107                                                            |
| Goodness-of-fit on F <sup>2</sup>          | 1.101                                                                 |

|                                          |              |
|------------------------------------------|--------------|
| Final R indexes                          | R1 = 0.0247  |
| [I $\geq$ 2 $\sigma$ (I)]                | wR2 = 0.0633 |
| Final R indexes                          | R1 = 0.0249  |
| [all data]                               | wR2 = 0.0635 |
| Largest peak/hole [e $\text{\AA}^{-3}$ ] | 1.01/-0.85   |
| Flack X parameter                        | 0.113(11)    |

Table S2: Bond parameters for *AlaPbBr<sub>3</sub>H<sub>2</sub>O* (in  $\text{\AA}$ ).

| Atom 1-Atom 2...Atom 3      | Atom 1-Atom 2 | Atom 2...Atom 3 |
|-----------------------------|---------------|-----------------|
| Pb1-Br2...N6 <sup>i</sup>   | 3.013(1)      | 3.327           |
| Pb1-Br3...O3 <sup>ii</sup>  | 2.989(1)      | 3.365           |
| Pb1-Br3...H3B <sup>ii</sup> | 2.989(1)      | 2.575           |
| Pb1-Br1...H6C <sup>iv</sup> | 2.974(3)      | 3.024           |
| N6-H6A...O3 <sup>i</sup>    | 0.890         | 2.714           |
| N6-H6A...O1 <sup>i</sup>    | 0.890         | 1.978           |
| N6-H6B...Br2 <sup>i</sup>   | 0.890         | 2.471           |
| N6-H6C...Br2 <sup>i</sup>   | 0.890         | 2.613           |
| C4-N6...Br2 <sup>i</sup>    | 1.49(1)       | 3.327           |
| C3-O2...O3 <sup>iii</sup>   | 1.32(1)       | 2.600           |
| C3-O2...H3A <sup>iii</sup>  | 1.32(1)       | 2.410           |
| C3-O1...N6 <sup>i</sup>     | 1.19(1)       | 2.830           |
| O2-H2...O3 <sup>iii</sup>   | 0.82          | 1.894           |
| C5-H5B...O2 <sup>iv</sup>   | 0.96          | 2.531           |
| C5-H5C...O1 <sup>i</sup>    | 0.96          | 2.668           |
| O3-H3A...H2 <sup>iii</sup>  | 0.85          | 1.825           |
| O3-H3B...Br3 <sup>ii</sup>  | 0.85          | 2.575           |
| C3-C4                       | 1.51(1)       |                 |
| C4-H4                       | 0.980         |                 |
| C4-C5                       | 1.51(2)       |                 |
| C5-H5A                      | 0.96          |                 |

Symmetry code: (i)  $1/2-x, -1/2+y, 1-z$ ; (ii)  $x, -1+y, z$ ; (iii)  $x, y, z$ ; (iv)  $1/2+x, 1/2+y, z$ .

Table S3: Mode positions (centers, in  $\text{cm}^{-1}$ ) and assignment of Raman spectrum of *AlaPbBr<sub>3</sub>H<sub>2</sub>O*.

| Wavenumber (cm <sup>-1</sup> ) | Assignment                       | References |
|--------------------------------|----------------------------------|------------|
| 73, 86                         | L-Alanine lattice modes          | 1          |
| 79                             | $\delta_{as}$ (Br-Pb-Br)         | 2-4        |
| 101                            | $\nu_s$ (Br-Pb-Br)               |            |
| 136                            | $\nu_s$ (Br-Pb)                  |            |
| 122                            | $\nu_{as}$ (Br-Pb).              |            |
| 321                            | $\delta$ (CCNC)                  | 5-8        |
| 394                            | $\delta$ (NCC)                   |            |
| 517                            | $\tau$ (NH <sub>3</sub> )        | 9          |
| 541                            | $r$ (CO <sub>2</sub> )           |            |
| 620                            | $\delta$ (CO <sub>2</sub> )      |            |
| 816                            | $\nu$ (CN)                       | 10,11      |
| 1122                           | $\rho$ (NH <sub>3</sub> )        |            |
| 1207                           | $\rho$ (CH <sub>3</sub> )        |            |
| 1425, 1453                     | $\delta_{as}$ (CH <sub>3</sub> ) |            |
| 1568                           | $\delta_{as}$ (NH <sub>3</sub> ) |            |
| 1720                           | $\nu$ (CO <sub>2</sub> )         |            |
| 2933                           | $\nu$ (NH <sub>3</sub> )         | 11         |
| 2950                           | $\nu$ (CH <sub>3</sub> )         |            |
| 2993, 3019                     | $\nu$ (CH)                       |            |

Table S4: Bond lengths and angles for [PbB<sub>6</sub>]<sup>4-</sup> octahedra of the organic-inorganic hybrid AlaPbBr<sub>3</sub>·H<sub>2</sub>O crystal, as well as the calculated bond length quadratic elongation ( $\langle\lambda\rangle$ ), and bond angle variance ( $\sigma^2$ ).

| Pb-Br Bond Length / Å          | Br-Pb-Br Angle / degrees |       |
|--------------------------------|--------------------------|-------|
| 2.9740                         | 98.37                    | 85.12 |
| 3.1240                         | 89.13                    | 88.85 |
| 3.0131                         | 87.26                    | 93.42 |
| 2.9886                         | 85.20                    | 92.82 |
| 3.0352                         | 93.59                    | 88.25 |
| 3.0758                         | 89.86                    | 88.90 |
| $\langle\lambda\rangle=0.9602$ | $\sigma^2=15.63$         |       |

Appendix 1

Split Pseudo-Voigt function

The fitting of PL curves and extracting their respective parameters were performed using the fity software.[1].

Pseudo-Voigt function: Is a name given to the sum of Gaussian and Lorentzian functions:

$$y = a_0 \left[ (1 - a_3) \exp\left(-\ln(2) \left(\frac{x - a_1}{a_2}\right)^2\right) + \frac{a_3}{1 + \left(\frac{x - a_1}{a_2}\right)^2} \right]$$

Here, long parameter names (like “height”, “center” and “hwhm”) were replaced with ai. In this case, a2 is half width at half maximum (HWHM=FWHM/2, where FWHM stands for full width...), which is proportional to the standard deviation:  $a_2 = \sqrt{2 \ln 2} \sigma$ .

Split Pseudo-Voigt function are used when the peak is noticeably asymmetric:

$$y(x; a_0, a_1, a_2, a_3, a_4, a_5) = \begin{cases} PseudoVoigt(x; a_0, a_1, a_2, a_4), & x \leq 1 \\ PseudoVoigt(x; a_0, a_1, a_3, a_5), & x > 1 \end{cases}$$

- 1 K. Machida, A. Kagayama and Y. Saito, *J. Raman Spectrosc.*, 1978, **7**, 188–193.
- 2 W. Castro Ferreira, B. S. Araújo, M. A. P. Gómez, F. E. O. Medeiros, C. W. de Araujo Paschoal, C. B. da Silva, P. T. C. Freire, U. F. Kaneko, F. M. Ardito, N. M. Souza-Neto and A. P. Ayala, *J. Phys. Chem. C*, 2022, **126**, 541–550.
- 3 M. Kumagai and T. Takagahara, *Phys. Rev. B*, 1989, **40**, 12359–12381.
- 4 B. Cheng, T. Y. Li, P. Maity, P. C. Wei, D. Nordlund, K. T. Ho, D. H. Lien, C. H. Lin, R. Z. Liang, X. Miao, I. A. Ajia, J. Yin, D. Sokaras, A. Javey, I. S. Roqan, O. F. Mohammed and J. H. He, *Commun. Phys.*, DOI:10.1038/s42005-018-0082-8.
- 5 V. Adinolfi, W. Peng, G. Walters, O. M. Bakr and E. H. Sargent, *Adv. Mater.*, 2018, **30**, 1700764.
- 6 Y. Chen, Y. Sun, J. Peng, J. Tang, K. Zheng and Z. Liang, *Adv. Mater.*, 2018, **30**, 1703487.
- 7 K. Hong, Q. Van Le, S. Y. Kim and H. W. Jang, *J. Mater. Chem. C*, 2018, **6**, 2189–2209.
- 8 J. Hong, D. Prendergast and L. Z. Tan, *Nano Lett.*, 2021, **21**, 182–188.
- 9 P. T. C. Freire, F. M. Barboza, J. A. Lima, F. E. A. Melo and J. M. Filho, in *Raman Spectroscopy and Applications*, InTech, 2017.
- 10 H. Susi and D. M. Byler, *J. Mol. Struct.*, 1980, **63**, 1–11.
- 11 V. V. Ghazaryan, G. Giester, M. Fleck and A. M. Petrosyan, *J. Mol. Struct.*, 2018, **1163**, 428–441.

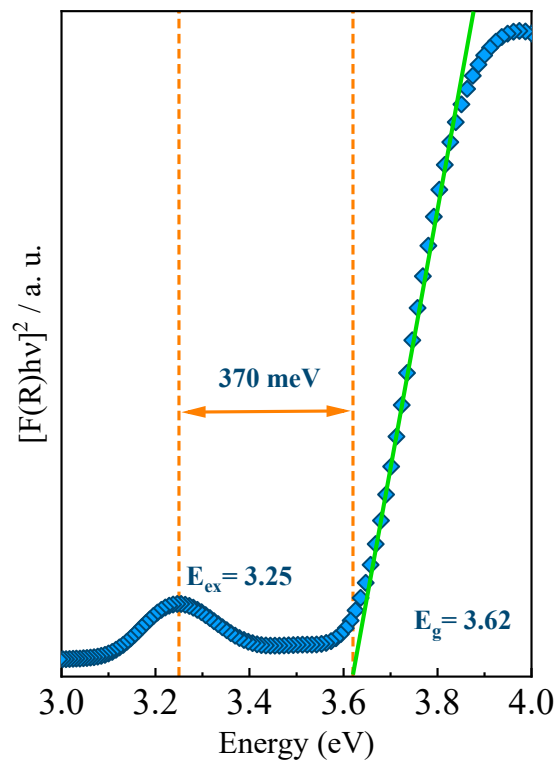

Figure S1: Exciton binding energy determination. The exciton binding energy was estimated taking the difference between the energy of the excitonic transition and the onset of the high-energy absorption band.

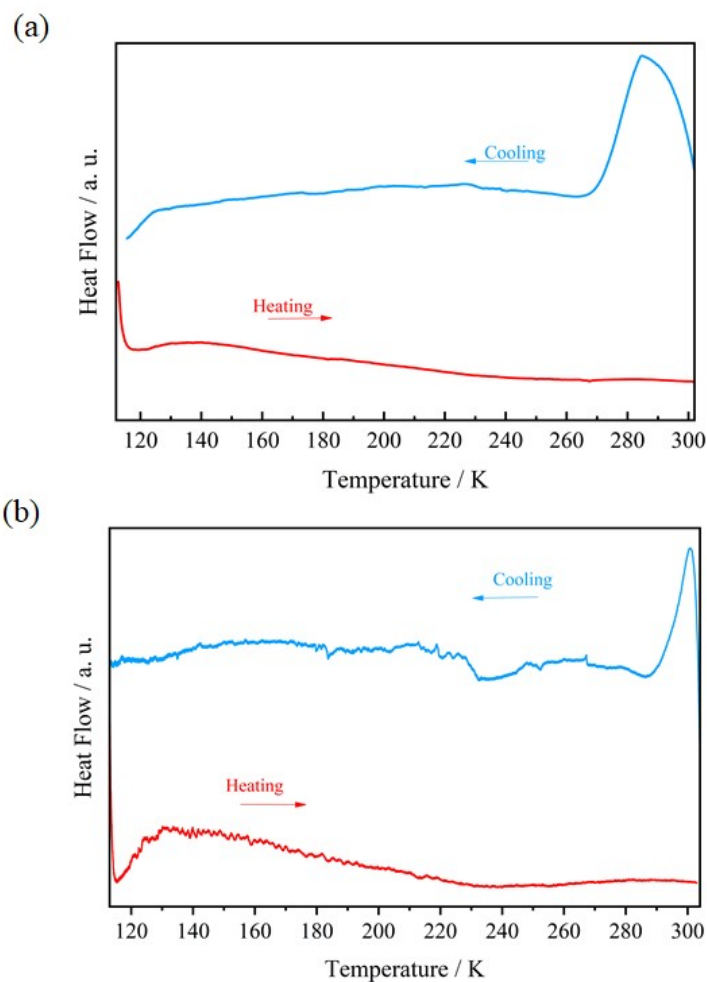

Figure S2: DSC thermogram of  $\text{AlaPbBr}_3 \cdot \text{H}_2\text{O}$  single crystals from 120 K up to 300 K in a) 10K/min rate and b) 5K/min rate.

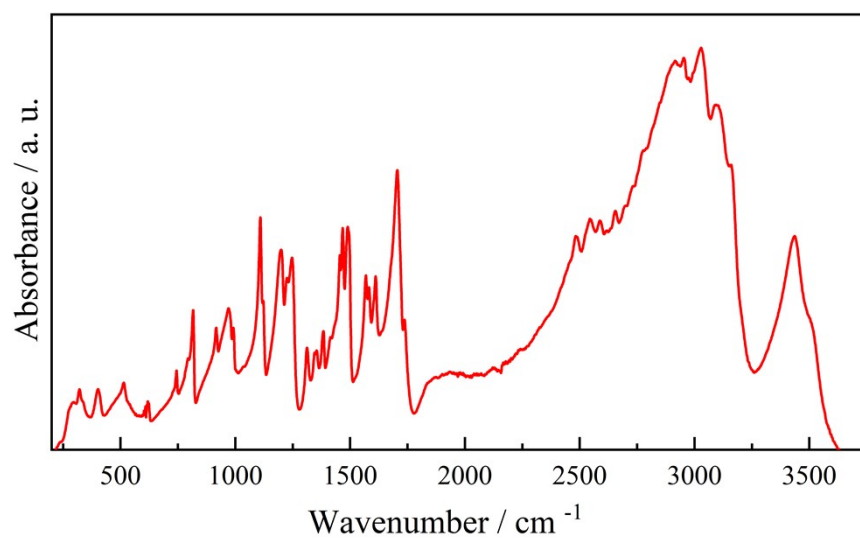

Figure S3: ATR-FTIR spectrum of  $\text{AlaPbBr}_3 \cdot \text{H}_2\text{O}$  at 300 K.

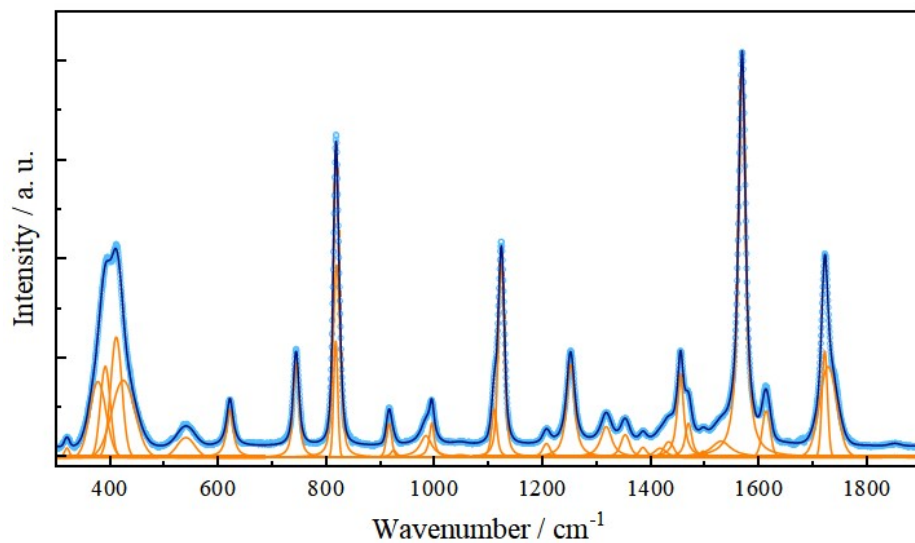

Figure S4: Intermediate-wavenumber region of the unpolarized Raman spectrum for  $\text{AlaPbBr}_3 \cdot \text{H}_2\text{O}$  crystals, measured with a 633 nm laser line at room temperature.

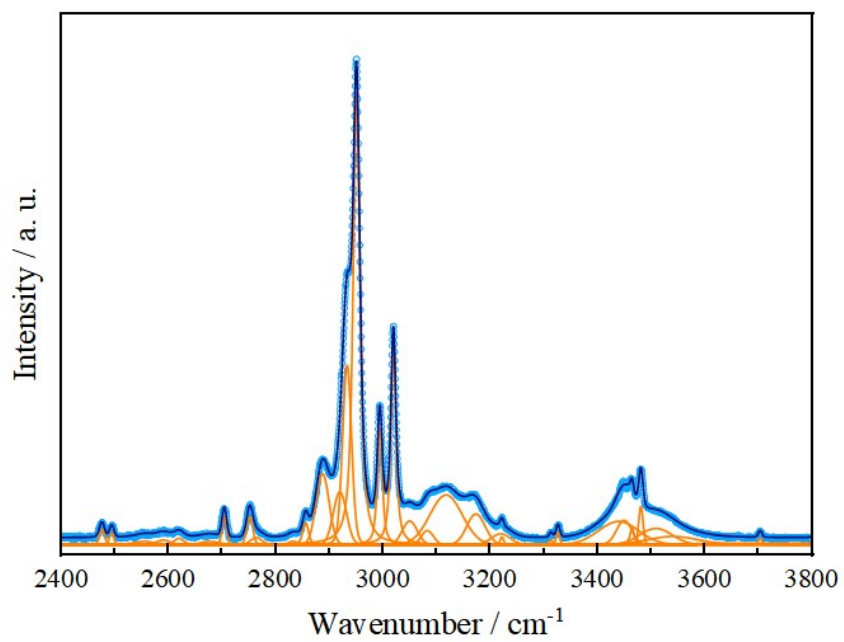

Figure S5: High-wavenumber region of the unpolarized Raman spectrum for  $\text{AlaPbBr}_3 \cdot \text{H}_2\text{O}$  crystals, measured with a 633 nm laser line at room temperature.
